# Supplementary material for: Successful i-GONAD in Mice at Early Zygote Stage through In Vivo Electroporation Three Min after Intraoviductal Instillation of CRISPR-Ribonucleoprotein
Source: MDPI journal article supplement (doi:10.3390/ijms231810678), 2022-09-14
Supplement: s1 [file s1]

Table S1. Summary of the *i*-GONAD-mediated genome editing targeting tyrosinase gene (*Tyr*) in the fetal offspring obtained after mating between female ICR and male C57BL6/J (B6) mice.

| Time of <i>i</i> -GONAD <sup>1</sup> | Treatment <sup>2</sup>    | No. pregnant mice/no. mice treated | No. fetuses obtained | No. fetuses carrying de-pigmented eyes (%) <sup>3</sup> | Fetuses with modified alleles <sup>4</sup> |                        |
|--------------------------------------|---------------------------|------------------------------------|----------------------|---------------------------------------------------------|--------------------------------------------|------------------------|
|                                      |                           |                                    |                      |                                                         | No. indels (%)                             | No. mosaic alleles (%) |
| 10:30 AM                             | 0 min with RNP + dye      | 5/13                               | 17                   | 2 (12%)                                                 | 3 (18%)                                    | 1 (6%)                 |
|                                      | 3 min with RNP + dye      | 3/11                               | 20                   | 11 (55%)                                                | 11 (55%)                                   | 4 (20%)                |
|                                      | 3 min with RNP + HA + dye | 5/6                                | 20                   | 14 (70%)                                                | 17 (85%)                                   | 6 (30%)                |
| 13:00 PM                             | 0 min with RNP + dye      | 6/7                                | 33                   | 6 (18%)                                                 | 6 (18%)                                    | 3 (9%)                 |
|                                      | 3 min with RNP + dye      | 6/7                                | 30                   | 21 (70%)                                                | 21 (70%)                                   | 9 (30%)                |
|                                      | 3 min with RNP + HA + dye | 5/6                                | 19                   | 15 (79%)                                                | 15 (79%)                                   | 4 (21%)                |
| 16:00 PM                             | 0 min with RNP + dye      | 7/10                               | 44                   | 21 (47 %)                                               | 22 (50%)                                   | 9 (20%)                |
|                                      | 3 min with RNP + dye      | 3/5                                | 27                   | 6 (22%)                                                 | 12 (44%)                                   | 8 (30%)                |
|                                      | 3 min with RNP + HA + dye | 4/6                                | 23                   | 10 (43%)                                                | 13 (57%)                                   | 5 (22%)                |

<sup>1</sup>*i*-GONAD was performed on 10:30-11:00 AM (which is shown as “10:30 AM”), 13:00-13:30 PM (which is shown as “13:00 PM”) or 16:00-16:30 PM (which is shown as “16:00 PM”).

<sup>2</sup>*i*-GONAD was performed using RNP (targeting *Tyr*) + dye (0.02% Fast Green FCF) or RNP + hyaluronidase (HA) + dye. In the former case, *in vivo* electroporation (EP) was carried out immediately (0 min) or 3 min after intraoviductal instillation of RNP + dye. In the latter case, *in vivo* EP was carried out 3 min after intraoviductal instillation of RNP + HA + dye. These treated females were allowed to survive until Day 12.5 of pregnancy.

<sup>3</sup>Fetuses at Day 12.5 of pregnancy obtained after *i*-GONAD were first subjected to visual inspection for the presence of pigmented eyes. The fetuses having de-pigmented eyes are considered genome-edited fetuses, since the endogenous wild-type *Tyr* locus in one allele derived from B6 males has been disrupted.

<sup>4</sup>Genotyping of tails from Day 12.5 fetuses obtained after *i*-GONAD was carried out. Direct sequencing of the PCR products revealed that the samples have indels in non-mosaic or mosaic fashion.
